# THE AMERICAN JOURNAL OF PSYCHIATRY

---

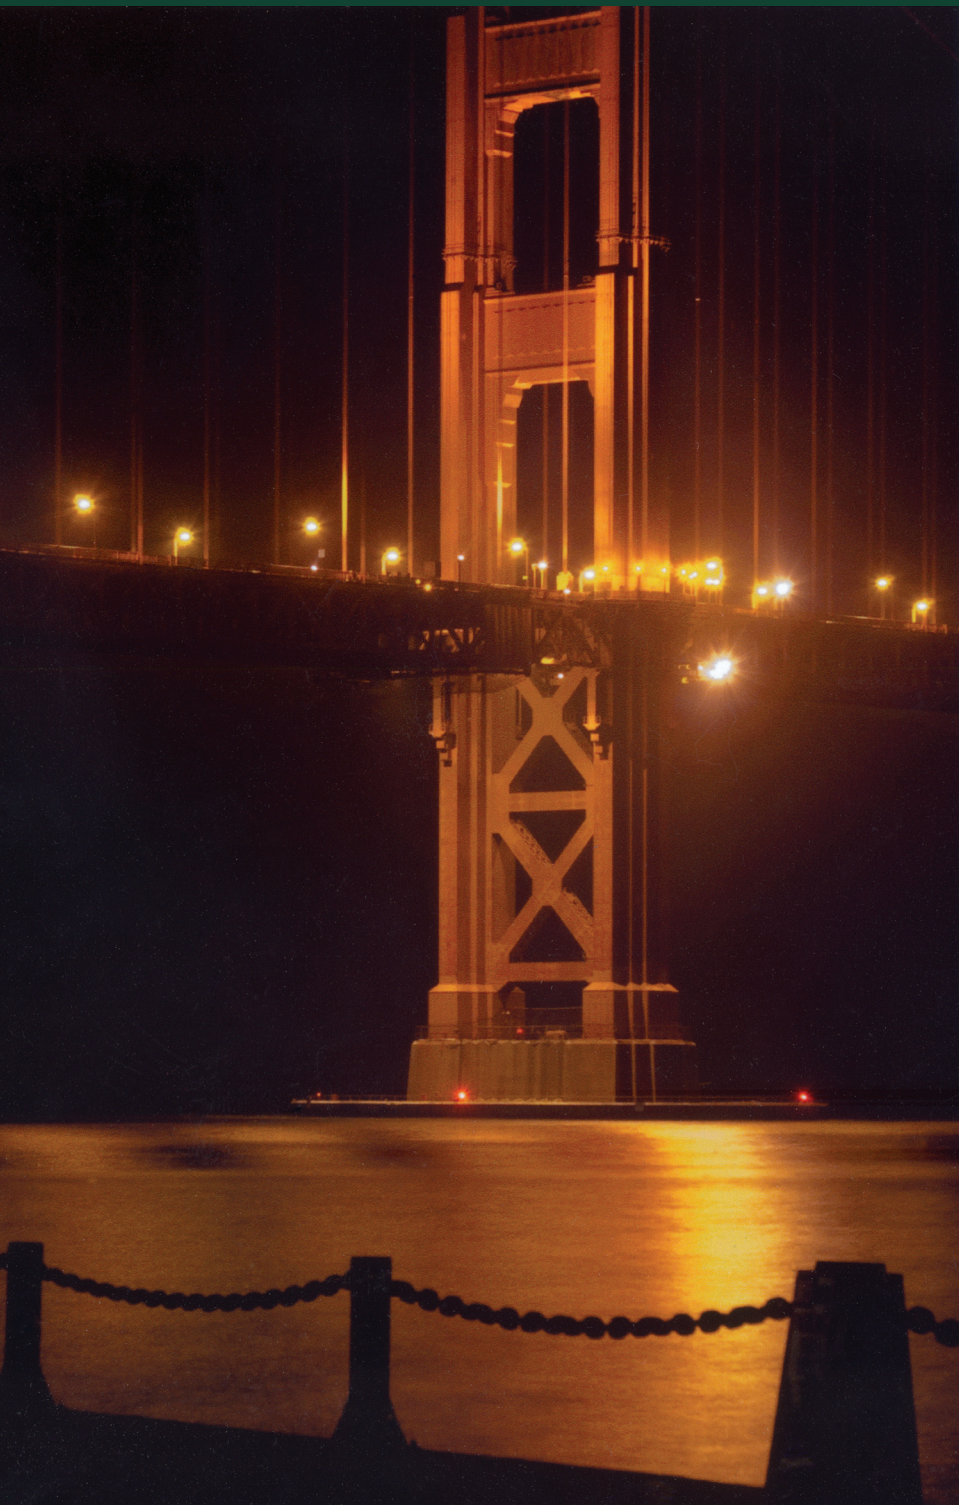

**In Search of Endophenotypes for Suicidal Behavior**

David Brent, M.D. 1087

◀ **Suicide From the Golden Gate Bridge**

Mel Blaustein, M.D. and  
Anne Fleming, M.D., M.S. 1111

**Familial Aggregation of Suicide Explained by Cluster B Traits: A Three-Group Family Study of Suicide Controlling for Major Depressive Disorder**

Alexander McGirr, M.Sc., et al. 1124

**The Epidemiology of At-Risk and Binge Drinking Among Middle-Aged and Elderly Community Adults: National Survey on Drug Use and Health**

Dan G. Blazer, M.D., Ph.D.  
and Li-Tzy Wu, Sc.D. 1162

**Continuing Medical Education** 1197

**October 2009**

**Volume 166 • Number 10**

---

Official Journal of the  
AMERICAN PSYCHIATRIC ASSOCIATION

---

[ajp.psychiatryonline.org](http://ajp.psychiatryonline.org)
