# THE AMERICAN JOURNAL OF PSYCHIATRY

## EDITOR-IN-CHIEF

Robert Freedman, M.D.

## DEPUTY EDITORS

David A. Lewis, M.D.

Robert Michels, M.D.

Daniel S. Pine, M.D.

Susan K. Schultz, M.D.

Carol A. Tamminga, M.D.

## EDITORIAL STAFF

### Editorial Director

Michael D. Roy

### Senior Editor/Features Writer

Jane Weaver, E.L.S.

### Senior Editor

John J. Guardiano, Ph.D.

### Production Manager

Julie C. Blair

### Graphic Designer

Steve Hennessey

### Assistant Editor

Angela Moore

### Editorial Support

### Services Manager

Kourtney Skinner

### Editorial Assistant

Samantha Luck

### Administrative Assistant

Victoria Chihos

### Assistants to the Editors

Lois Lilienthal

Laura Friedrich

Rachel Hogg

Russell A. Scholl

## ASSOCIATE EDITORS

Kathleen T. Brady, M.D., Ph.D.

David A. Brent, M.D.

Linda Brzustowicz, M.D.

Cameron S. Carter, M.D.

Howard H. Goldman,  
M.D., Ph.D.

Daniel C. Javitt, M.D.

Bankole Johnson, M.D.

Ellen Leibenluft, M.D.

Jeffrey A. Lieberman, M.D.

Barbara Milrod, M.D.

Maria A. Oquendo, M.D.

Jerrold F. Rosenbaum, M.D.

A. John Rush, M.D.

Larry J. Siever, M.D.

Patricia Suppes, M.D., Ph.D.

Myrna M. Weissman, Ph.D.

## EDITOR EMERITUS

Nancy C. Andreasen,  
M.D., Ph.D.

## FORMER EDITORS

Amariah Brigham, M.D.

1844-1849

T. Romeyn Beck, M.D.

1849-1854

John P. Gray, M.D.

1854-1886

G. Alder Blumer, M.D.

1886-1894

Richard Dewey, M.D.

1894-1897

Henry M. Hurd, M.D.

1897-1904

Edward N. Brush, M.D.

1904-1931

Clarence B. Farrar, M.D.

1931-1965

Francis J. Braceland, M.D.

1965-1978

John C. Nemiah, M.D.

1978-1993

The American Journal of Psychiatry is online at [ajp.psychiatryonline.org](http://ajp.psychiatryonline.org)

# THE AMERICAN PSYCHIATRIC ASSOCIATION

1000 Wilson Blvd., Suite 1825, Arlington, VA 22209-3901  
(888) 357-7924 (toll-free inside the U.S. and Canada) / (703) 907-7300  
web site: [www.psych.org/](http://www.psych.org/) e-mail: [apa@psych.org](mailto:apa@psych.org)

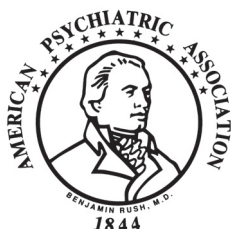

## OFFICERS 2009–2010

|                     |                                 |
|---------------------|---------------------------------|
| President           | Alan F. Schatzberg, M.D.        |
| President-Elect     | Carol A. Bernstein, M.D.        |
| Vice-President      | Jeffrey L. Geller, M.D., M.P.H. |
| Secretary-Treasurer | David Fassler, M.D.             |

## ASSEMBLY

|               |                           |
|---------------|---------------------------|
| Speaker       | Gary S. Weinstein, M.D.   |
| Speaker-Elect | Bruce A. Hershfield, M.D. |
| Recorder      | Ann Marie Sullivan, M.D.  |

## MEDICAL DIRECTOR'S OFFICE

|                                                                        |                                |
|------------------------------------------------------------------------|--------------------------------|
| Medical Director<br>and CEO                                            | James H. Scully, Jr., M.D.     |
| Chief Executive<br>Officer, American<br>Psychiatric<br>Publishing, Inc | Ronald E. McMillen             |
| Executive Director,<br>APIRE,<br>Division of Research                  | Darrel A. Regier, M.D., M.P.H. |
| Executive Director,<br>American Psychiatric<br>Foundation              | Paul T. Burke                  |

## BOARD OF TRUSTEES

|                           |                                  |
|---------------------------|----------------------------------|
| Becky Bay, M.D.           | Carolyn B. Robinowitz, M.D.      |
| Thomas K. Ciesla, M.D.    | Pedro Ruiz, M.D.                 |
| Mary Helen Davis, M.D.    | Jacqueline N. Smith, M.D.        |
| Melinda G. Fierros, M.D.  | Joyce A. Spurgeon, M.D.          |
| Dilip V. Jeste, M.D.      | Frederick J. Stoddard, Jr., M.D. |
| James E. Nininger, M.D.   | Nada L. Stotland, M.D., M.P.H.   |
| Roger Peele, M.D.         | John Chapman Urbaitis, M.D.      |
| Kayla M. Pope, M.D., J.D. | John J. Wernert III, M.D.        |
|                           | William M. Womack, M.D.          |

## AMERICAN PSYCHIATRIC PUBLISHING, INC

### BOARD OF DIRECTORS

|                          |                                         |
|--------------------------|-----------------------------------------|
| President and Chair      | Laura Weiss Roberts, M.D.               |
| Secretary                | Donna M. Norris, M.D.                   |
| Treasurer                | Joan A. Lang, M.D.                      |
| John M. Oldham,<br>M.D.  | Pedro Ruiz, M.D.                        |
| Katharine Phillips, M.D. | Donna E. Stewart, M.D.,<br>F.R.C.P.(C.) |
|                          | Amy Ursano, M.D.                        |

### EX-OFFICIO MEMBERS

|                                                           |                               |
|-----------------------------------------------------------|-------------------------------|
| APA President                                             | Alan F. Schatzberg, M.D.      |
| APA President-Elect                                       | Carol A. Bernstein, M.D.      |
| APA Secretary-<br>Treasurer                               | David Fassler, M.D.           |
| APA Medical Director<br>and CEO                           | James H. Scully, Jr., M.D.    |
| Editor-in-Chief,<br>The American Journal<br>of Psychiatry | Robert Freedman, M.D.         |
| Editor-in-Chief, Books                                    | Robert E. Hales, M.D., M.B.A. |

The American Journal of Psychiatry is online at [ajp.psychiatryonline.org](http://ajp.psychiatryonline.org)

THE AMERICAN PSYCHIATRIC ASSOCIATION  
Chairpersons of Councils, Commissions, Committees, and Task Forces

**Standing Committees**

---

**Bylaws**

John O. Gaston, M.D.

**Elections**

Kathleen M. Mogul, M.D.

**Ethics**

Wade C. Myers, M.D.

**Finance and Budget**

Frank W. Brown, M.D.

**Audit**

David Fassler, M.D.

**Investment Oversight**

Larry R. Faulkner, M.D.

**Joint Reference**

Carol A. Bernstein, M.D.

**Membership**

Joseph Ezra V. Rubin, M.D.

**Nominating**

Nadah Stotland, M.D., M.P.H.

**Tellers**

Eliot Sorel, M.D.

**Council on Adult Psychiatry**

---

Thomas N. Wise, M.D.

**Council on Advocacy and Government Relations**

---

Robert Paul Cabaj, M.D.

*Advocacy and Litigation Funding*

Jeffrey L. Metzner, M.D.

**Council on Children, Adolescents, and Their Families**

---

Michael Houston, M.D.

*Agnes Purcell McGavin Award*

John E. Schowalter, M.D.

*Blanche F. Ittleson Research Award*

Elizabeth B. Weller, M.D.

**Council on Communications**

---

Jeffrey A. Borenstein

**Council on Healthcare Systems and Financing**

---

Anita Smith Everett, M.D.

*APA/Business Relations*

Stephen H. Heidel, M.D.

*Reimbursement for Psychiatric Care*

Joseph T. English, M.D.

*RBRVS, Codes and Reimbursement*

Ronald M. Burd, M.D.

**Council on Medical Education and Lifelong Learning**

---

Sandra Sexson, M.D.

*APA/SAMHSA Minority Fellowship Selection and Advisory*

Maria A. Oquendo, M.D.

*Joint Sponsorship of Continuing Medical Education (CME)*

Adam T. Kaul, M.D.

*Scientific Program*

Julio Licino, M.D.

*Scientific Program Committee of the Institute on Psychiatric Services*

Stephen M. Goldfinger, M.D.

*Task Force to Update the Ethics Annotations*

Laura W. Roberts, M.D.

*Vestermark Award*

Frederick G. Guggenheim, M.D.

**Council on Minority Health and Health Disparities**

---

Sandra C. Walker, M.D.

**Council on Psychiatry And Law**

---

Patricia R. Recupero, M.D., J.D.

*Isaac Ray Award*

Renee L. Binder, M.D.

*Judicial Action*

Jeffrey S. Janofsky, M.D.

*Manfred S. Guttmacher Award*

Marilyn Price, M.D., C.M.

**Council on Research and Quality Care**

---

Jeffrey A. Lieberman, M.D.

*Electronic Health Records*

Laura J. Fochtman, M.D.

*Research Awards*

Stuart C. Yudofsky, M.D.

*Steering Committee on Practice Guidelines*

Joel Yager, M.D.

*Task Force on DSM-V*

David J. Kupfer, M.D.

*Task Force on Gender Identity Disorder*

William M. Byne

*Task Force to Revise the Practice of Electroconvulsive Therapy*

Sarah H. Lisanby
